# Supplementary material for: Observations of simultaneous aggressive anemia correction and intravitreal therapy for aggressive retinopathy of prematurity: A multimodal ROP assessment study (MROPAS) report number 2
Source: Research Square preprint supplement (doi:10.21203/rs.3.rs-7814106/v1), 2025-11-04
Supplement: Supplementary file 1 [file 00810724de2352fa8db12ed2.docx]

Supplemental Table 1: Key Baseline fundus and optical coherence tomography biomarkers and their distribution in the two groups.

| **Baseline Fundus biomarkers** | **Group 1 (n=40 eyes)** | **Group 2 (n=40 eyes)** | **Both Group 1 and Group 2 (n=80 eyes)** | **P-value and**  **(CI 95%)** |
| --- | --- | --- | --- | --- |
| Vitreous hemorrhage | 4 (10%) | 4 (10%) | 8 (10%) | 0.838  (0.94,1.0) |
| Preretinal superficial hemorrhage / subhyaloid hemorrhage | 18 (45%) | 22 (55%) | 40 (50%) | 0.948  (0.92,1.0) |
| Intraretinal hemorrhage | 14 (35%) | 16 (40%) | 30 (38%) | 0.976  (0.94,1.0) |
| Roth spots | 4 (10%) | 6 (15%) | 10 (12%) | 0.940  (0.92,1.0) |
| Multi-layered hemorrhages | 12 (30%) | 14 (35%) | 26 (33%) | 0.984  (0.98,1.0) |
| Sclerosed vessels | 8 (20%) | 6 (15%) | 14 (17%) | 0.988  (0.94,1.0) |
| Zone 1 aggressive retinopathy of prematurity  (A-ROP) | 28 (70%) | 24 (60%) | 52 (65%) | 0.974  (0.96,1.0) |
| Zone 2 aggressive retinopathy of prematurity  (A-ROP) | 12 (30%) | 16 (40%) | 28 (35%) | 0.960  (0.98,1.0) |
| **Baseline Optical coherence tomography biomarkers suggestive of ischemia** |  |  |  |  |
| Hyperreflectivity of inner retinal layers | 20 (50%) | 16 (40%) | 36 (45%) | 0.924  (0.94,1.0) |
| Choroidal thinning (<250 microns) at the posterior pole | 16 (40%) | 14 (35%) | 30 (38%) | 0.980  (0.98,1.0) |
