# Supplementary material for: Observations of simultaneous aggressive anemia correction and intravitreal therapy for aggressive retinopathy of prematurity: A multimodal ROP assessment study (MROPAS) report number 2
Source: Research Square preprint supplement (doi:10.21203/rs.3.rs-7814106/v1), 2025-11-04
Supplement: Supplementary file 2 [file 0b15722b44b1a93a0efdc0b3.docx]

**Supplemental Table 4:** Outcome analysis for additional treatment in Group 1 and Group 2

| **Outcome analysis for additional treatment** | **Group 1 (n=40 eyes)** | **Group 2 (n=40 eyes)** | **P value**  **(Group 1 vs Group 2)**  **CI 95%** | **P-value**  **GEE excluding one eye per patient**  **CI 95%** |
| --- | --- | --- | --- | --- |
| Reactivation, needing laser. | 6 out of 40 eyes (15%) | 18 out of 40 eyes (45%) | 0.038  (-0.40, -0.64) | 0.058  (-0.84, -0.90) |
| Peripheral avascular retina at 16 weeks post-injection, needing laser. | 6 out of 40 eyes (15%) | 14 out of 40 eyes (35%) | 0.044  (-0.46, -0.68) | 0.064  (-0.76, -0.88) |
| Total eyes needing additional laser treatment. | 12 out of 40 eyes (30%) | 32 out of 40 eyes (80%) | 0.001  (-0.44, -0.64) | 0.022  (-0.64, -0.78) |
