# Supplementary material for: Observations of simultaneous aggressive anemia correction and intravitreal therapy for aggressive retinopathy of prematurity: A multimodal ROP assessment study (MROPAS) report number 2
Source: Research Square preprint supplement (doi:10.21203/rs.3.rs-7814106/v1), 2025-11-04
Supplement: Supplementary file 3 [file 2589330aaae0ec6e25e33099.docx]

**Supplemental Table 3:** Multimodal imaging biomarkers and their outcome analysis in Group 1 and Group 2

| **Fundus biomarkers were analyzed at 3 weeks post-intravitreal anti-vascular endothelial growth factor (anti-VEGF).** | **Group 1 (n=40 eyes)** | **Group 2 (n=40 eyes)** | **P value**  **(Group 1 vs Group 2)**  **CI 95%** | **P-value**  **GEE**  **excluding one eye per patient**  **CI 95%** |
| --- | --- | --- | --- | --- |
| Reducing Preretinal superficial hemorrhage/subhyaloid hemorrhage | 18 out of 18 (100%) | 6 out of 22 (55%).  The remaining 16 eyes with hemorrhages did not show any reduction | 0.024  (0.42,0.78) | 0.036  (0.70,0.86) |
| Reducing Intraretinal Hemorrhage | 14 out of 14 (100%) | 6 out of 16 (38%) | 0.013  (0.48,0.62) | 0.034  (0.74,0.80) |
| Reducing multi-layered hemorrhages | 12 out of 12 (100%) | 6 out of 14 (43%) | 0.030  (0.44,0.68) | 0.048  (0.86,0.94) |
| Rapid Vascular progression to zone 3 at 3-weeks post anti-VEGF | 28 out of 40 eyes (70%) | 10 out of 40 eyes (25%) | 0.004  (0.34,0.50) | 0.016  (0.38,0.62) |
| **OCT biomarkers analyzed at 3 weeks post-anti-VEGF** |  |  |  |  |
| Resolution of hyperreflectivity of inner retinal layers | 16 out of 20 (80%) | 8 out of 16 (50%) | 0.18  (0.90,0.94) | 0.48  (0.94,0.98) |
| Choroidal thickness (>250 microns) at the posterior pole | 10 out of 16 (62%) | 6 out of 14 (43%) | 0.46  (0.90,0.98) | 0.78  (0.92,0.98) |
