# Supplementary material for: Observations of simultaneous aggressive anemia correction and intravitreal therapy for aggressive retinopathy of prematurity: A multimodal ROP assessment study (MROPAS) report number 2
Source: Research Square preprint supplement (doi:10.21203/rs.3.rs-7814106/v1), 2025-11-04
Supplement: Supplementary file 4 [file e430e7f01ffb1fe78f3b8fb2.docx]

Supplemental Table 5: Subgroup analysis of babies with moderate and severe anemia at presentation.

| **Characteristics and**  **Clinical outcomes** | **Severe Anemia**  **(<7gm%)** | **Moderate anemia**  **(7-9.9gm%)** | **p-value**  **CI 95%** | **P-value**  **GEE**  **Excluding one eye per patient**  **CI 95%** |
| --- | --- | --- | --- | --- |
| Number of babies | 11 | 29 | 0.014 |  |
| Mean Hemoglobin at presentation (gm% or gm/dl) | 6.6 | 8.7 | 0.032 |  |
| Mean Gestational age (weeks) | 27 | 29 | 0.746  (0.96-1.06) |  |
| Mean birth weight (grams) | 1240 | 1330 | 0.245  (0.94-1.06) |  |
| Babies with zone 1 aggressive retinopathy of prematurity | 9 out of 11 babies  (82%) | 17 out of 29 babies  (59%) | 0.048  (0.76, 0.84) | 0.084  (0.84, 0.98) |
