# Supplementary material for: Observations of simultaneous aggressive anemia correction and intravitreal therapy for aggressive retinopathy of prematurity: A multimodal ROP assessment study (MROPAS) report number 2
Source: Research Square preprint supplement (doi:10.21203/rs.3.rs-7814106/v1), 2025-11-04
Supplement: Supplementary file 5 [file f3e7cd7e27586c852df28846.docx]

**Supplemental Table 2:** Neonatal systemic factors of babies in Group 1 and Group 2.

| **Systemic factors** | **Group 1 (20 babies)** | **Group 2 (20 babies)** | **P-value**  **(Group 1 vs Group 2)** | **CI 95%** |
| --- | --- | --- | --- | --- |
| Gestational age in weeks | 28 (28 + 1.0) | 29 (29+ 1.0) | 0.834 | (0.96-1.04) |
| Post menstrual age in weeks | 32 (32+1.5) | 33 (33+ 1.5) | 0.990 | (0.98-1.08) |
| Birth weight in grams | 1275 (1275+ 20) | 1310 (1310+ 20) | 0.726 | (0.94-1.02) |
| Blood haemoglobin in gm/dl  At baseline | 7.8 (7.8+ 0.4) | 8.4 (8.4+ 0.4) | 0.742 | (0.96-1.04) |
| Severe anemia in gm/dl | 6 babies  6.4 (6.4 + 0.4) | 5 babies  6.8 (6.8 + 0.4) | 0.969 | (0.94-1.06) |
| Moderate anemia in gm/dl | 14 babies  8.6 (8.6 + 0.6)  [10 babies had Hb between 7-9gm% and 4 babies had Hb between 9-10gm%] | 15 babies  8.8 (8.8 + 0.6)  [11 babies had Hb between 7-9gm% and 4 babies had Hb between 9-10gm%] | 0.930 | (0.90-1.02) |
